# Supplementary material
Source: Research Square preprint supplement (doi:10.21203/rs.3.rs-9523377/v1)
Supplement: Supplementary file 1 [file 75fd17d9fb52faf60c464e58.docx]

Appendix Tables

*Appendix Table A1. Robustness checks.*

Panel A. Dropping AvgRating

| Variable | (1) InStrength | (2) PageRank | (3) Betweenness |
| --- | --- | --- | --- |
| Text sentiment | -1.9807*** | -1.8229*** | -2.2362** |
| (0.7535) | (0.6828) | (0.9745) |  |
| Log review volume | 0.3212*** | 0.2730*** | 0.5628*** |
| (0.0738) | (0.0675) | (0.1029) |  |
| Attribute diversity | -0.0440 | -0.1599 | -0.9891 |
| (0.5047) | (0.4840) | (0.8172) |  |
| Negative service share | -1.3961* | -1.5148** | -1.9331 |
| (0.8333) | (0.7384) | (1.2260) |  |
| Average review length | 0.0091*** | 0.0095*** | 0.0221*** |
| (0.0030) | (0.0026) | (0.0035) |  |
| N | 786 | 786 | 786 |
| R² | 0.5031 | 0.3794 | 0.3328 |

Panel B. Stricter sample threshold (ReviewVol_is >= 50)

| Variable | (4) InStrength | (5) PageRank | (6) Betweenness |
| --- | --- | --- | --- |
| Text sentiment | -2.4150** | -2.5607*** | -4.2421*** |
| (1.0443) | (0.9792) | (1.5427) |  |
| Log review volume | 0.2000* | 0.1481 | 0.3948** |
| (0.1046) | (0.0964) | (0.1558) |  |
| Attribute diversity | 0.0686 | 0.1096 | -0.1209 |
| (0.7040) | (0.6783) | (1.0878) |  |
| Negative service share | -2.0287** | -2.4607*** | -4.0736** |
| (0.9865) | (0.9064) | (1.5959) |  |
| Average review length | 0.0098** | 0.0101*** | 0.0231*** |
| (0.0038) | (0.0034) | (0.0043) |  |
| N | 575 | 575 | 575 |
| R² | 0.5203 | 0.3924 | 0.3618 |

Panel C. Alternative betweenness transformation

| Variable | (7) asinh Betweenness |
| --- | --- |
| Text sentiment | -2.7260** |
| (1.2288) |  |
| Log review volume | 0.6396*** |
| (0.1246) |  |
| Attribute diversity | -1.1485 |
| (0.9476) |  |
| Negative service share | -2.1580 |
| (1.5473) |  |
| Average review length | 0.0255*** |
| (0.0041) |  |
| N | 786 |
| R² | 0.3292 |

Note. Table 2 reports the main specifications. Appendix Table A1 presents additional robustness checks. Standard errors are reported in parentheses. One-, two-, and three-asterisk markers indicate significance at the 10%, 5%, and 1% levels, respectively.

*Appendix Table A2. Heterogeneity by mutually exclusive attraction type.*

Panel A. Dependent variable: ln(1+InStrength_is)

| Variable | Museum | Ancient architecture | Mountain-and-water | Park |
| --- | --- | --- | --- | --- |
| Text sentiment | 0.2013 | -1.9037 | -0.4593 | -0.2110 |
| (1.0480) | (1.2570) | (1.2527) | (1.6711) |  |
| Log review volume | 0.1952 | 0.3669*** | 0.4504** | 0.6090* |
| (0.2091) | (0.1230) | (0.1785) | (0.3696) |  |
| Attribute diversity | 1.6547 | 1.8196*** | -0.0127 | -0.0864 |
| (1.0707) | (0.6570) | (1.0204) | (0.7915) |  |
| Negative service share | 0.7156 | -0.3934 | -0.6808 | 0.6833 |
| (0.9948) | (1.2667) | (1.7511) | (2.2600) |  |
| Average review length | 0.0063 | 0.0098*** | 0.0221*** | -0.0013 |
| (0.0065) | (0.0031) | (0.0062) | (0.0051) |  |
| N | 46 | 250 | 184 | 112 |
| Number of attractions | 14 | 88 | 66 | 37 |

Panel B. Dependent variable: ln(PageRank_is)

| Variable | Museum | Ancient architecture | Mountain-and-water | Park |
| --- | --- | --- | --- | --- |
| Text sentiment | 0.6992 | -1.5547 | -0.6545 | -0.4360 |
| (0.8918) | (1.0549) | (1.1330) | (1.5498) |  |
| Log review volume | 0.1599 | 0.3191*** | 0.3450** | 0.3965 |
| (0.1739) | (0.1035) | (0.1647) | (0.2890) |  |
| Attribute diversity | 1.4184 | 1.5536** | 0.0732 | -0.3052 |
| (1.0154) | (0.6195) | (0.8701) | (0.5660) |  |
| Negative service share | 1.3263 | -0.1709 | -1.4218 | -0.0339 |
| (0.9326) | (1.0421) | (1.5687) | (1.8488) |  |
| Average review length | 0.0051 | 0.0107*** | 0.0210*** | 0.0010 |
| (0.0052) | (0.0029) | (0.0065) | (0.0039) |  |
| N | 46 | 250 | 184 | 112 |
| Number of attractions | 14 | 88 | 66 | 37 |

Panel C. Dependent variable: ln(1+1000*Betweenness_is_approx)

| Variable | Museum | Ancient architecture | Mountain-and-water | Park |
| --- | --- | --- | --- | --- |
| Text sentiment | 2.1854 | -1.5755 | -1.5566 | 2.6487 |
| (2.6202) | (1.8184) | (1.6918) | (2.4153) |  |
| Log review volume | 0.1461 | 0.8052*** | 0.4843** | 0.5604* |
| (0.5893) | (0.1815) | (0.2463) | (0.3138) |  |
| Attribute diversity | 3.9720 | 0.8059 | 0.7146 | 0.9289 |
| (3.7187) | (1.3327) | (1.3377) | (1.4603) |  |
| Negative service share | 4.5993 | 0.0547 | -1.7742 | 4.3615 |
| (3.7984) | (2.0911) | (2.9774) | (2.6578) |  |
| Average review length | 0.0052 | 0.0282*** | 0.0313*** | 0.0099 |
| (0.0196) | (0.0058) | (0.0073) | (0.0079) |  |
| N | 46 | 250 | 184 | 112 |
| Number of attractions | 14 | 88 | 66 | 37 |

Note. Attraction types are mutually exclusive at the attraction level. The ancient-architecture and mountain-and-water groups display relatively more stable patterns, whereas the museum group is small. Standard errors are reported in parentheses. One-, two-, and three-asterisk markers indicate significance at the 10%, 5%, and 1% levels, respectively.

*Appendix Table A3. Variable definitions and sample construction.*

Panel A. Variable definitions

| Variable | Description |
| --- | --- |
| ln_instrength | Log transformation of weighted in-strength in the seasonal tourist mobility network. |
| ln_pagerank | Log transformation of the PageRank indicator in the seasonal tourist mobility network. |
| ln_betweenness | Log-transformed measure based on approximate betweenness centrality. |
| Sentiment_is | Pure-text sentiment measure constructed from review text without absorbing rating priors. |
| ln_ReviewVol_is | Logarithm of the number of reviews in each attraction-by-season unit. |
| AttrDiv_is | Smoothed normalized entropy based on the intensity of attribute mentions. |
| NegService_is | Share of reviews containing service-related content with explicit negative context. |
| AvgRating_is | Mean star rating in each attraction-by-season unit. |
| ImageShare_is | Share of image-containing reviews in the unit. |
| AvgReviewLength_is | Average review length in characters/words within the unit. |

Panel B. Sample construction

| Stage | Description |
| --- | --- |
| Strict 2019 review corpus | 102,026 reviews; 417 attractions |
| Attraction-by-season aggregation | 1,631 attraction-by-season observations |
| Matched review-network analysis file | 1,500 attraction-by-season observations; 381 attractions |
| Baseline regression sample | ReviewVol_is >= 30; 786 observations; 273 attractions |
| Mutually exclusive type-heterogeneity subsamples | Museums 46;Ancient architecture 250;Mountain-and-water 184;Parks 112 |

Note. The mutually exclusive type-heterogeneity analysis applies a unique attraction-level assignment rule. Observations outside the four focal categories are grouped as “other” and do not enter Appendix Table A2.
